# Supplementary material for: Associations between Household-Level Exposures and All-Cause Diarrhea and Pathogen-Specific Enteric Infections in Children Enrolled in Five Sentinel Surveillance Studies
Source: MDPI journal article supplement (doi:10.3390/ijerph17218078), 2020-11-02
Supplement: s1 [file s1]

## Supplemental Materials:

### Missing data:

Missing data related to the five household-level exposures were mostly due to incomplete baseline questionnaires. The main exception was the crowding variable in the SHINE study, in which information was collected on the numerator (the number of household members) but not the denominator (the number of rooms used for sleeping). Furthermore, in RECODISA the total number of rooms was recorded, but not the number used for sleeping. MAL-ED and Novel biomarkers recorded both the number of used rooms for sleeping and the number of rooms overall. Missing data for the exposures (and their components, in the case of crowding) were imputed using multivariate normal regression (MVN) with an iterative Monte Carlo method. The total number of rooms was included since it was reasoned that it would provide information as to the number of rooms for sleeping. Site, and country were also included in the imputation as predictors. Since the SHINE data lacked an entire variable component, equivalent data from the Zimbabwe Demographic and Health Surveys dating back to 2005 for the survey stratum in which the study site was located (rural Midlands province) was appended to the study database, prior to imputation to add more locally relevant information.

**Table S1: Percent missing data for household-level variables used in imputation by study**

|                         | Water | Sanitation | Flooring | Education | Household members | Rooms for sleeping | Total rooms |
|-------------------------|-------|------------|----------|-----------|-------------------|--------------------|-------------|
| <b>GEMS</b>             | 0.0%  | 0.0%       | 24.0%    | 40.7%     | 16.7%             | 24.0%              | 100.0%      |
| <b>MAL-ED</b>           | 8.6%  | 8.6%       | 8.6%     | 8.6%      | 8.6%              | 8.6%               | 8.6%        |
| <b>Novel biomarkers</b> | 0.0%  | 0.0%       | 0.0%     | 5.3%      | 1.3%              | 0.0%               | 0.0%        |
| <b>RECODISA</b>         | 0.2%  | 0.0%       | 0.7%     | 0.3%      | 0.1%              | 100.0%             | 0.1%        |
| <b>SHINE</b>            | 5.5%  | 3.3%       | 5.3%     | 2.3%      | 1.5%              | 100.0%             | 100.0%      |

Anthropometric measurements that were not contemporaneous with the dates of sample collection were linearly interpolated and extrapolated based on the date of assessment before calculating length- and weight-for-age Z-scores. Then missing Z-scores were interpolated using the predictions from linear mixed effect models that adjusted for age with up to fourth order quadratic terms, as well as sex and allowed for site and subject specific random effects. Missing data relating to the feeding variables were imputed using predictions from Cox proportional hazard models that modeled age first of introduction of complementary foods and then of full weaning adjusting for site and sex.

Associations between household-level exposures and all-cause diarrhea and pathogen-specific enteric infections in five large surveillance studies, J. M. Colston *et al.* 2020, *International Journal of Environmental Research and Public Health*

**Table S2: Mapping of exposure variable definitions used by included studies onto published definitions [1–3]**

|              | Published definition              | MAL-ED                | GEMS                                                 | RECODISA                                   | SHINE                                               | Novel Biomarkers                  |
|--------------|-----------------------------------|-----------------------|------------------------------------------------------|--------------------------------------------|-----------------------------------------------------|-----------------------------------|
| Water source | Piped into dwelling               | Piped into dwelling   | Piped into house                                     | Piped water                                | Piped into dwelling                                 | Spout in the house                |
|              | Piped to yard/plot                | Piped to yard/plot    | Piped into yard                                      |                                            | Piped into yard or plot                             | Spout on the plot                 |
|              | Public tap/standpipe              | Public tap/standpipe  | Public tap                                           |                                            | Piped into public tap or standpipe                  | Public tap/fountain               |
|              | Piped to neighbor                 | -                     | -                                                    |                                            | -                                                   | -                                 |
|              | Improved<br>Tube well or borehole | Tube well or borehole | Deep tube well                                       | -                                          | Borehole                                            | Drilled well                      |
|              |                                   |                       | Shallow tube well                                    |                                            |                                                     |                                   |
|              |                                   |                       | Borehole                                             |                                            |                                                     |                                   |
|              | Protected well                    | Protected well        | Covered well in house or yard<br>Covered public well | Deep well                                  | Deep well, protected<br>Shallow well, protected     | Covered open well                 |
|              | Protected spring                  | -                     | Protected spring                                     | -                                          | Protected spring                                    | -                                 |
|              | Rainwater                         | -                     | Rainwater                                            | -                                          | Rainwater harvester                                 | -                                 |
|              | Unprotected well                  | Unprotected well      | Open well in house or yard<br>Open public well       | Waterhole ( <i>cacimba</i> )               | Deep well, unprotected<br>Shallow well, unprotected | Open well without cover           |
|              |                                   |                       |                                                      |                                            |                                                     |                                   |
|              | Unprotected spring                | -                     | Unprotected spring                                   | -                                          | Unprotected spring                                  | -                                 |
|              | Unimproved<br>Surface water       | Surface water         | Pond or lake                                         | River, weir                                | Surface water (river/dam/stream/Lake)               | Surface water (river/spring/lake) |
|              |                                   |                       | River or spring                                      |                                            | River bank/bed                                      |                                   |
|              |                                   |                       | Dam or earth pan                                     |                                            |                                                     |                                   |
|              | Tanker truck                      | -                     | -                                                    | Tanker<br>Barrel car ( <i>carro pipa</i> ) | Water trucking/Bowser                               | -                                 |
|              | Cart with small tank              | -                     | -                                                    | Cart                                       | -                                                   | -                                 |
|              | Bottled water                     | -                     | Bought                                               | Mineral water                              | Bottled water                                       | -                                 |
|              | Other                             | Other                 | Other                                                | Other source                               | Other                                               | Other                             |

Associations between household-level exposures and all-cause diarrhea and pathogen-specific enteric infections in five large surveillance studies, J. M. Colston *et al.* 2020, *International Journal of Environmental Research and Public Health*

**Table S2: Mapping of exposure variable definitions used by included studies onto published definitions [1–3]**

|                   | <b>Published definition</b>                             | <b>MAL-ED</b>                 | <b>GEMS</b>                    | <b>RECODISA</b>           | <b>SHINE</b>                                      | <b>Novel Biomarkers</b>                   |
|-------------------|---------------------------------------------------------|-------------------------------|--------------------------------|---------------------------|---------------------------------------------------|-------------------------------------------|
| <b>Sanitation</b> | Flush - to piped sewer system                           | Flush to piped sewer system   | Flush toilet                   | Public sewerage network   | Flush toilet                                      | Flush to sewer system                     |
|                   | Flush - to septic tank                                  | Flush to septic tank          | -                              | -                         |                                                   | -                                         |
|                   | Flush - to pit latrine                                  | Flush to pit latrine          | -                              | -                         |                                                   | Flush to pit latrine                      |
|                   | Flush - unspecified                                     | -                             | -                              | -                         |                                                   | -                                         |
|                   | Improved<br>Pit latrine - ventilated improved pit (VIP) | -                             | Ventilated VIP with water seal | -                         | Blair Latrine (VIP)                               | Closed latrine with ventilated hole (VIP) |
|                   |                                                         |                               | Improved Pit latrine           |                           |                                                   |                                           |
|                   |                                                         |                               | Pour flush toilet              |                           |                                                   |                                           |
|                   | Pit latrine - with slab                                 | -                             | -                              | Pit ( <i>Fossa</i> )      | Pit latrine with slab (non-VIP)                   | -                                         |
|                   | Composting toilet                                       | -                             | -                              | -                         | Composting toilet                                 | -                                         |
|                   | Not shared                                              | Not shared                    | Not shared                     | -                         | Not shared                                        | -                                         |
|                   | Flush - to somewhere else                               | Flush to somewhere else       | -                              | -                         | -                                                 | Flush to somewhere else (inc. don't know) |
|                   | Flush - don't know where                                | -                             | -                              | -                         | -                                                 |                                           |
|                   | Pit latrine - without slab/open pit                     | Pit latrine without flush     | Traditional pit toilet         | -                         | Pit latrine with no slab                          | Hole latrine                              |
|                   | No facility/bush/field                                  | No facility/bush/field/bucket | No facility                    | Without a sewerage system | No toilet or latrine of any type at the homestead | No toilet/bushes/open field               |
| <b>Unimproved</b> | Bucket toilet                                           | -                             | -                              | -                         | -                                                 | -                                         |
|                   | Hanging toilet/latrine                                  | -                             | -                              | -                         | -                                                 | -                                         |
|                   | Other                                                   | Other                         | Other                          | -                         | -                                                 | Other                                     |
|                   | Shared                                                  | Shared                        | Shared                         | -                         | >1 household shares this toilet facility          | Shares toilet with another household      |
|                   |                                                         |                               |                                |                           |                                                   |                                           |

Associations between household-level exposures and all-cause diarrhea and pathogen-specific enteric infections in five large surveillance studies, J. M. Colston *et al.* 2020, *International Journal of Environmental Research and Public Health*

**Table S2: Mapping of exposure variable definitions used by included studies onto published definitions [1–3]**

|        | Published definition | MAL-ED                            | GEMS                   | RECODISA                  | SHINE             | Novel Biomarkers           |                   |
|--------|----------------------|-----------------------------------|------------------------|---------------------------|-------------------|----------------------------|-------------------|
| Floors | Improved             | Tablets/wood planks               | Wood                   | Wood planks               | Masonry           | -                          | Wood              |
|        |                      | Palm, bamboo                      | -                      | Palm/bamboo               | -                 | -                          | -                 |
|        |                      | Mat                               | -                      | -                         | -                 | -                          | -                 |
|        |                      | Adobe                             | -                      | -                         | -                 | -                          | -                 |
|        |                      | Parquet, polished wood            | -                      | Parquet or polished wood  | -                 | -                          | -                 |
|        |                      | Vinyl, asphalt strips, floor, mat | -                      | Vinyl or asphalt strips   | -                 | -                          | Ceramics or vinyl |
|        |                      | Linoleum                          | -                      | -                         | -                 | -                          |                   |
|        |                      | Ceramic tiles, mosaic             | Ceramic tiles or vinyl | Ceramic tile              | -                 | -                          | Ceramics or vinyl |
|        |                      | Cement                            | Cement/concrete        | Cement                    | -                 | Concrete                   | Cement/concrete   |
|        |                      | Carpet                            | -                      | Carpet                    | -                 | -                          | -                 |
|        |                      | Stone                             | -                      | -                         | -                 | -                          | -                 |
|        |                      | Bricks                            | -                      | -                         | -                 | Brick/cement               | -                 |
|        | Unimproved           | Earth/sand/clay/mud/dung          | Earth/Sand             | <i>Taipa</i> <sup>i</sup> | Smoothed mud      | Earth/sand/clay/mud        |                   |
|        |                      |                                   | Dung                   | -                         | Earth, sand, dung | -                          |                   |
|        |                      | Other                             | Other                  | Other                     | Mixed             | Sticks, wood, grass, straw | -                 |

Associations between household-level exposures and all-cause diarrhea and pathogen-specific enteric infections in five large surveillance studies, J. M. Colston *et al.* 2020, *International Journal of Environmental Research and Public Health*

**Table S2: Mapping of exposure variable definitions used by included studies onto published definitions [1–3]**

|                     | Published definition                        | MAL-ED                                           | GEMS                                               | RECODISA                                                           | SHINE                                                          | Novel Biomarkers                                  |                                        |
|---------------------|---------------------------------------------|--------------------------------------------------|----------------------------------------------------|--------------------------------------------------------------------|----------------------------------------------------------------|---------------------------------------------------|----------------------------------------|
| Caregiver education | Primary education: 1 – 6 years of schooling | Primary caregiver completed 6 years of education | Primary caregiver completed primary school         | Mother's educational level > complete primary                      | Highest class completed by caregiver was standard 6 or higher  | Primary caregiver completed 6 grades of education |                                        |
| Crowding            | Numerator                                   | Usual resident                                   | Number of people sleeping in household             | Number of people sleeping regularly in household for past 6 months | Total number of inhabitants of the house (children and adults) | Household size                                    | Number of people sleeping in the house |
|                     | Denominator                                 | Number of rooms used for sleeping                | Number of rooms in the household used for sleeping | Number of rooms in the household used for sleeping                 | Total number of rooms / compartments in the house              | -                                                 | Number of rooms used for sleeping      |

<sup>i</sup> In Brazil, a “*taipa*” is a small hut or dwelling constructed from adobe and other natural materials. For this analysis, it was assumed that *taipas* and mixed material dwellings had unimproved flooring whereas those made from masonry had improved flooring.

Associations between household-level exposures and all-cause diarrhea and pathogen-specific enteric infections in five large surveillance studies, J. M. Colston *et al.* 2020, *International Journal of Environmental Research and Public Health*

Table S3. Prevalence of time-varying covariates among study subjects at enrollment in 22 study sites

|                                   | Exclusively<br>breastfed | Partially<br>breastfed | Fully weaned | Moderate-<br>severe stunting | Moderate-<br>severe<br>underweight | Total subjects |
|-----------------------------------|--------------------------|------------------------|--------------|------------------------------|------------------------------------|----------------|
| <b>Bamako, Mali</b>               | 665 (9.9)                | 2,885 (43.0)           | 3,161 (47.1) | 1,223 (18.2)                 | 1,109 (16.5)                       | 6,711          |
| <b>Basse, The Gambia</b>          | 221 (4.7)                | 2,294 (48.4)           | 2,223 (46.9) | 1,212 (25.6)                 | 1,032 (21.8)                       | 4,738          |
| <b>Bhaktapur, Nepal</b>           | 240 (100.0)              | 0 (0.0)                | 0 (0.0)      | 12 (5.0)                     | 20 (8.3)                           | 240            |
| <b>Cajazeiras, Brazil</b>         | 9 (4.5)                  | 79 (39.5)              | 112 (56.0)   | 18 (9.0)                     | 5 (2.5)                            | 200            |
| <b>Crato, Brazil</b>              | 5 (2.5)                  | 100 (50.0)             | 95 (47.5)    | 36 (18.0)                    | 11 (5.5)                           | 200            |
| <b>Dhaka, Bangladesh</b>          | 265 (100.0)              | 0 (0.0)                | 0 (0.0)      | 44 (16.6)                    | 48 (18.1)                          | 265            |
| <b>Fortaleza, Brazil</b>          | 233 (100.0)              | 0 (0.0)                | 0 (0.0)      | 6 (2.6)                      | 9 (3.9)                            | 233            |
| <b>Haydom, Tanzania</b>           | 256 (97.7)               | 6 (2.3)                | 0 (0.0)      | 39 (14.9)                    | 12 (4.6)                           | 262            |
| <b>Karachi, Pakistan</b>          | 685 (13.1)               | 2,069 (39.6)           | 2,477 (47.4) | 2,528 (48.3)                 | 2,089 (39.9)                       | 5,231          |
| <b>Kolkata, India</b>             | 749 (14.4)               | 2,680 (51.4)           | 1,785 (34.2) | 1,569 (30.1)                 | 1,093 (21.0)                       | 5,214          |
| <b>Loreto, Peru</b>               | 358 (94.7)               | 18 (4.8)               | 2 (0.5)      | 61 (16.1)                    | 19 (5.0)                           | 378            |
| <b>Manhiça, Mozambique</b>        | 721 (22.3)               | 1,244 (38.5)           | 1,262 (39.1) | 966 (29.9)                   | 390 (12.1)                         | 3,227          |
| <b>Midlands, Zimbabwe</b>         | 1,046 (100.0)            | 0 (0.0)                | 0 (0.0)      | 94 (9.0)                     | 65 (6.2)                           | 1,046          |
| <b>Mirzapur, Bangladesh</b>       | 1,071 (18.1)             | 3,424 (57.9)           | 1,421 (24.0) | 1,523 (25.7)                 | 1,086 (18.4)                       | 5,916          |
| <b>Naushahro Feroze, Pakistan</b> | 164 (59.2)               | 110 (39.7)             | 3 (1.1)      | 74 (26.7)                    | 61 (22.0)                          | 277            |
| <b>Nyanza, Kenya</b>              | 147 (3.7)                | 2,257 (57.1)           | 1,547 (39.2) | 1,227 (31.1)                 | 606 (15.3)                         | 3,951          |
| <b>Ouricuri, Brazil</b>           | 7 (3.5)                  | 83 (41.5)              | 110 (55.0)   | 17 (8.5)                     | 9 (4.5)                            | 200            |
| <b>Patos, Brazil</b>              | 6 (3.0)                  | 73 (36.5)              | 121 (60.5)   | 23 (11.5)                    | 8 (4.0)                            | 200            |
| <b>Picos, Brazil</b>              | 15 (7.5)                 | 100 (50.0)             | 85 (42.5)    | 33 (16.5)                    | 12 (6.0)                           | 200            |
| <b>Souza, Brazil</b>              | 10 (5.0)                 | 81 (40.5)              | 109 (54.5)   | 39 (19.5)                    | 8 (4.0)                            | 200            |
| <b>Vellore, India</b>             | 249 (99.2)               | 0 (0.0)                | 2 (0.8)      | 41 (16.3)                    | 33 (13.1)                          | 251            |
| <b>Venda, South Africa</b>        | 314 (100.0)              | 0 (0.0)                | 0 (0.0)      | 35 (11.1)                    | 21 (6.7)                           | 314            |

Associations between household-level exposures and all-cause diarrhea and pathogen-specific enteric infections in five large surveillance studies, J. M. Colston *et al.* 2020, *International Journal of Environmental Research and Public Health*

## **References:**

1. World Health Organization, UNICEF. Joint Monitoring Programme (JMP) for Water Supply and Sanitation. 2019. <https://washdata.org/>: Accessed: 2013 Apr 26
2. Florey L, Taylor C. Using household survey data to explore the effects of improved housing conditions on malaria infection in children in Sub-Saharan Africa. Rockville, Maryland, USA: ICF International; 2016 Aug. <https://dhsprogram.com/publications/publication-AS61-Analytical-Studies.cfm>: Accessed: 2019 May 30
3. Graetz N, Woyczynski L, Wilson KF, Hall JB, Abate KH, Abd-Allah F, et al. Mapping disparities in education across low- and middle-income countries. *Nature. Nature Research*; 2019;
